## First detection of Zika virus in neotropical primates in Brazil: a possible new reservoir

Silvana Favoretto<sup>1\*</sup>, Danielle Araújo<sup>1</sup>, Danielle Oliveira<sup>2</sup>, Nayle Duarte<sup>3</sup>, Flavio Mesquita<sup>2</sup>, Paolo Zanotto<sup>2</sup>, Edison Durigon<sup>2\*</sup>

- Authors Affiliations:

<sup>1</sup>Pasteur Institute – State Health Department –Av. Paulista,393 – CEP 01311000 - São Paulo - Brazil.

<sup>2</sup>Institute of Biomedical Science – University of São Paulo - ICBII – Cidade Universitária – CEP 05508900- - Brazil

<sup>3</sup> State Health Department – R. dos Tabajaras, 268 – CEP 60060510 - Fortaleza Ceará - Brazil

\*Corresponding author, E-mail: [srfavoretto@usp.br](mailto:srfavoretto@usp.br) Phone: 55 11 3091-7293.

In Brazil, the first diagnosed case of Zika virus (ZIKV) in humans was reported in 2015 in Rio Grande do Norte State in the Northeast region, with subsequent reports in 22 States of the Country<sup>1</sup>. We tested samples from sera and oral swabs from fifteen marmosets (*Callithrix jacchus*) and nine capuchin-monkeys (*Sapajus libidinosus*) captured (SISbio license 45196-3) from July to November of 2015 in Ceará State, an epidemic area for ZIKV. Preliminary detection of these samples indicated 29% of positivity (7/24) by Real time PCR<sup>2</sup> (Cycle Threshold *Ct* average 31,64 to 37,78). We found four positive samples from marmosets and three positive samples from capuchin monkeys. To further validate the Real time PCR we sequenced the amplified product from one capuchin monkey and one marmoset, and found that it had ZIKV with 100% similarity to other ZIKV from South America (Table 1). Primates were captured at several, far apart regions of the State, including coastal, savannah (caatinga biome) and a mountain range with rainforest remnants. It is noteworthy that marmosets were free ranging, co-inhabiting with humans; the capuchins were pets except for one that was kept in a screening center for wild animals in Fortaleza (capital of the State and coastal region). After sample collection, they were tagged with microchips and released back to their original site. Currently, Brazil is facing a massive ZIKV epidemic, associated with severe neuropathy. Three hundred and sixty three cases of microcephaly were notified in Ceará alone in the period from October 2015 to March 2016. Out of these, seventy (19.3%) had laboratory confirmation to related to ZIKV infections<sup>3</sup>. Crucially, cases of microcephaly occurred in municipalities from where viremic monkeys were sampled (Figure 1). This is the first report on ZIKV detection among Neotropical primates, which stands as a caveat for the possibility that they could act as reservoirs, similar to the sylvatic cycle of yellow fever in Brazil<sup>4</sup>.

**Table 1:** Register number, animal, species, Cycle Threshold (*Ct*) and e-value from GenBank of samples from neotropical primates positive for Zika virus in Brazil.

| Number       | Animal          | Species                    | <i>Ct</i> | E-value (BlastN search) |
|--------------|-----------------|----------------------------|-----------|-------------------------|
| bruspCE05_15 | Capuchin monkey | <i>Sapajus libidinosus</i> | 37.20     | not sequenced           |
| bruspCE08_15 | Capuchin monkey | <i>Sapajus libidinosus</i> | 31.34     | 3e -148                 |
| bruspCE46_15 | Marmoset        | <i>Callithrix jacchus</i>  | 37.32     | not sequenced           |
| bruspCE47_15 | Marmoset        | <i>Callithrix jacchus</i>  | 37.43     | not sequenced           |
| bruspCE59_15 | Marmoset        | <i>Callithrix jacchus</i>  | 35.14     | not sequenced           |
| bruspCE63_15 | Marmoset        | <i>Callithrix jacchus</i>  | 37.02     | 3e -24                  |
| bruspCE68_15 | Capuchin monkey | <i>Sapajus libidinosus</i> | 37.73     | not sequenced           |

This work was funded by FAPESP project N° 2014/16333-1

## References

1. Brazil, Ministry of Health. Monitoring of cases of dengue, chikungunya and zika virus fever to the epidemiologic week five, 2016. *Boletim epidemiológico N.8*, **47**, 2016. <http://portalsaude.saude.gov.br/images/pdf/2016/fevereiro/29/2016-006---Dengue-SE5-publica---o.pdf>. (Accessed 09/03/2016).
2. Lanciotti RS, Kosoy OL, Laven JJ et al. Genetic and serologic properties of Zika virus associated with an epidemic, Yap State, Micronesia, 2007. *Emerg Infect Dis*. 2008; **14**(8):1232-9.
3. Ceará, State Health Department. Epidemiologic report: microcephaly and CNS malformations. March 07 2016. <http://www.saude.ce.gov.br/index.php/boletins>. (Accessed in 09/03/2016).
4. Brazil, Ministry of Health. *Surveillance guide for epizootics in non-human primates and applied entomology for yellow fever surveillance*. 2 ed –Brasília: Ministry of Health, 2014.[http://bvsms.saude.gov.br/bvs/publicacoes/guia\\_vigilancia\\_epizootias\\_primatas\\_entomologia.pdf](http://bvsms.saude.gov.br/bvs/publicacoes/guia_vigilancia_epizootias_primatas_entomologia.pdf).

**Figure 1. Widespread distribution of ZIKV infected primates in distinct biomes in the Northeast of Brazil. 1A)** Map of Ceará State, Brazil showing cities with notified (green) and confirmed (red) cases of microcephaly and congenital malformations, associated with ZIKV infections. Black dots indicate neotropical primates found to be positive for ZIKV in real time PCR. Two positive marmosets and one positive capuchin monkey was found in the mountain range. One positive capuchin monkey was found in the Coastal region. Two marmosets and one capuchin monkey were found in the savannah (caatinga) region. **1B)** Position of the Ceará State in the Northeast of Brazil. **1C)** A positive pet capuchin monkey with its owner.

1A

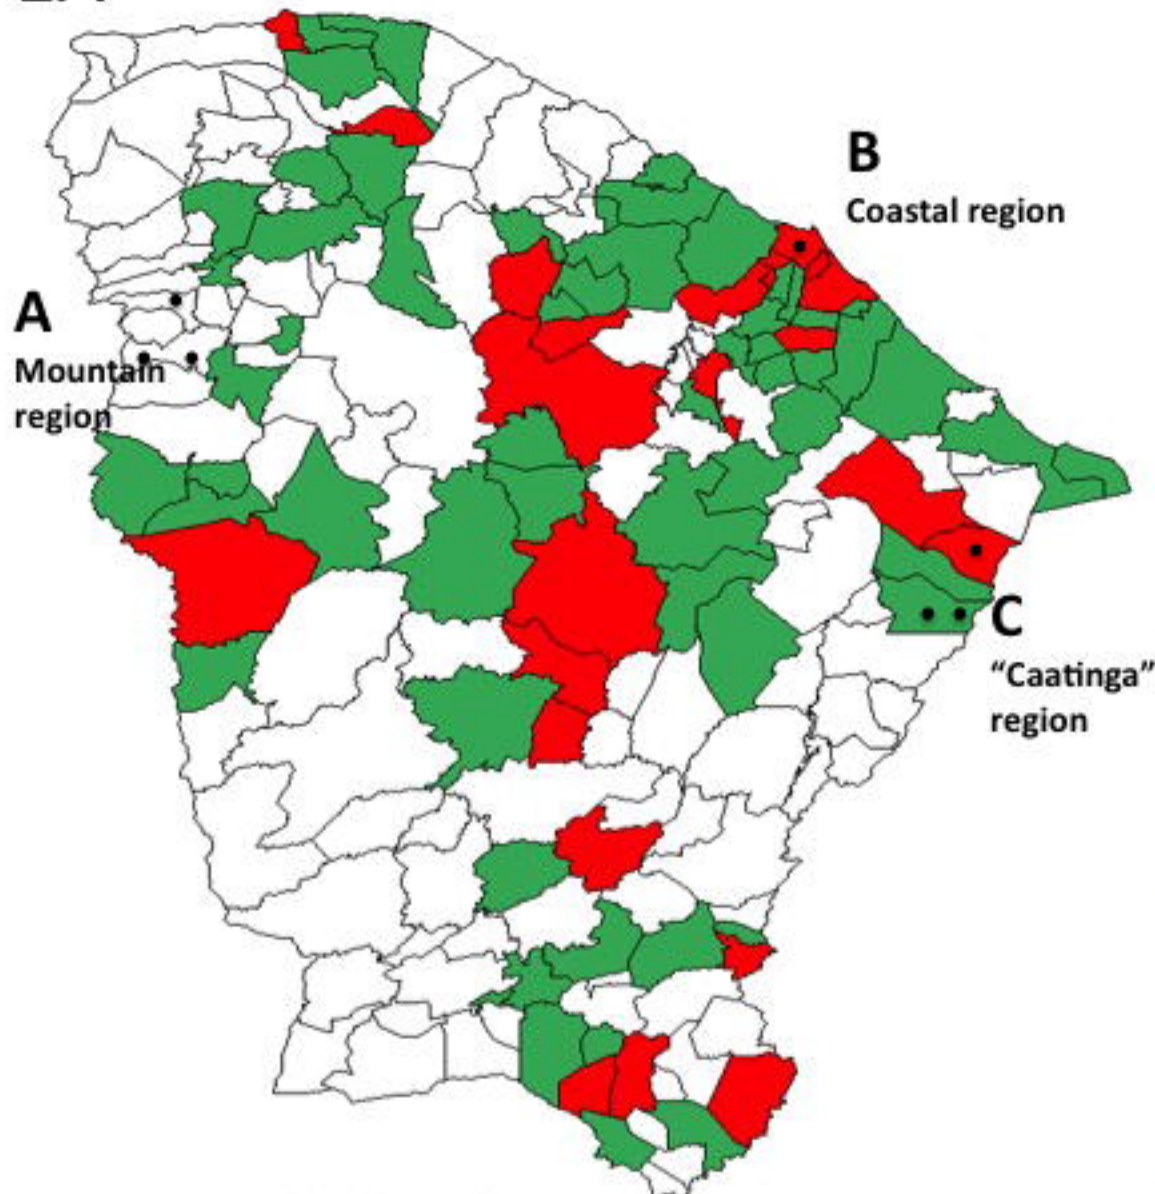

Source: Secretary of Health, Ceará State, Brazil, 2016

1B

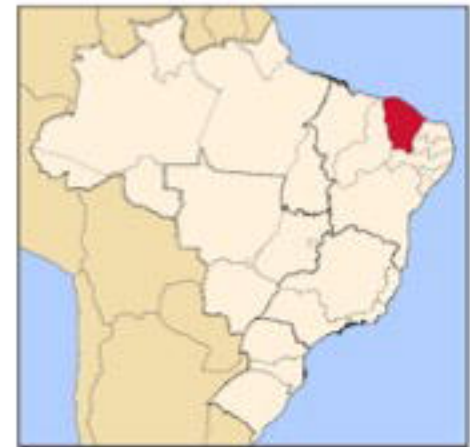

1C

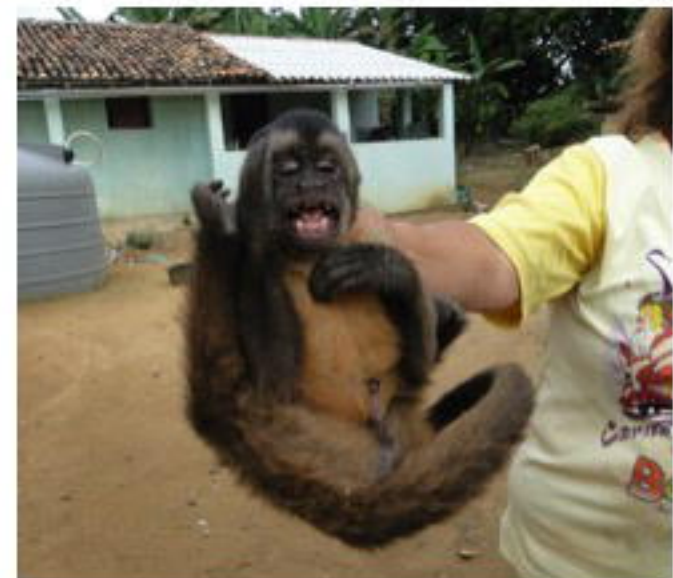

Source: Center on Rabies Research
